1 **Title: A Systematic Review of the Association between Sedentary**  
2 **Behavior and Non-Motor Symptoms of Parkinson’s Disease**

3 Aiza Khan <sup>a</sup>, Joy Ezeugwa <sup>a</sup>, Victor Ezeugwu\* <sup>a</sup>

4 a: Faculty of Rehabilitation Medicine, University of Alberta, Edmonton, Alberta, Canada

5 \*Corresponding author

6 Victor Ezeugwu, PT, MSc, PhD

7 Assistant Professor

8 Department of Physical Therapy

9 [ezeugwu@ualberta.ca](mailto:ezeugwu@ualberta.ca)

10

11 **Abstract**

12 Background

13 Parkinson’s disease, known for motor symptoms, often brings early non-motor issues that

14 severely affect patients' quality of life. While there are not many effective treatments, physical

15 activity and exercise can help. Yet, another component of the movement intensity continuum

16 warrants examination—prolonged sitting or sedentary behavior. Thus, aim of this study was to

17 perform a systematic review to investigate the relationship between sedentary behaviour and

18 non-motor symptoms, specifically cognitive decline, depression and sleep deficits in Parkinson’s

19 disease.

20 Methods

21 Conforming to PRISMA guidelines, we reviewed the literature up to February 28, 2023, to

22 investigate how sedentary behavior correlates with non-motor symptoms such as cognitive

23 impairment, depression, and sleep disturbances in Parkinson's disease. A systematic search of the  
24 literature was conducted via electronic databases including MEDLINE, CINAHL, Scopus,  
25 PubMed and PsycINFO. The eligibility criteria for study selection was: (i) If it studied the  
26 Individuals with Parkinson's disease with sedentary behaviour(iii) studies investigating the  
27 association between sedentary behavior and at least one of the non-motor symptoms, including  
28 depression, sleep quality, and/or cognitive impairment. New-castle-Ottawa scale for cross-  
29 sectional and cohort studies was used to perform quality assessment of the studies.

#### 30 Results

31 Of the 463 publications found, 7 studies met the inclusion criteria. All the studies were  
32 observational. Total number of cases across all studies were 980. Collectively, these studies  
33 show that prolonged sedentary time is associated with increased cognitive, depressive, and sleep-  
34 related problems.

#### 35 Conclusion

36 Recognizing sedentary behavior as an independent factor holds pivotal significance. The  
37 intricate relationship between sedentary behavior and Parkinson's disease non-motor symptoms  
38 necessitates further exploration to potentially enhance therapeutic strategies for those living with  
39 the disease.

40 **Prospero Registration number:** PROSPERO (ID: CRD42023405422) on April 11, 2023

41

42 **Key words:** Parkinson’s disease, non-motor symptoms, Sedentary behavior, Cognition,

43 Depression

44

## 45 1.Introduction

46 1.1 Parkinson’s disease (PD) is a progressive neurodegenerative disorder affecting 1 to 2% of

47 adults over age 65 years and 4% of adults over age 80 years (1). PD has been identified as the

48 “fastest growing neurological disorder” between 1990 and 2016, contributing to a significant

49 number of deaths and disabilities globally (2). In 2019, PD was attributed with 5.8 million

50 disability-adjusted life-years (DALYs) across 195 countries, representing an 81% increase since

51 2000 (2). Click or tap here to enter text.Clinically, PD is primarily characterized by motor

52 symptoms such as bradykinesia, resting tremor, rigidity, gait abnormalities, and postural

53 impairment (1). However, it is important to note that a diverse range of non-motor symptoms

54 (NMS) also play a significant role in PD symptomology (3)(4). These NMS include sleep

55 disturbances, sensory deficits, mood disorders including depression, apathy, or anxiety,

56 autonomic nervous system dysfunction (orthostatic hypotension and obstipation), olfactory

57 dysfunction, and cognitive impairment (3)(4). Several studies indicate that NMS often precede

58 motor symptoms and can have a more profound impact on the quality of life of individuals living

59 with PD(5). Mood disorders such as depression and anxiety, as well as pain, fatigue, and

60 cognitive impairment contribute to the disease burden as PD progresses (3)(6).

61 Despite their significance, NMS frequently go unrecognized and undertreated, posing a  
62 challenge for people living with PD (7). Moreover, NMS in PD may present significant  
63 challenges that affect day-to-day functioning and physical activity levels, as many people with  
64 PD often struggle to meet the recommended guidelines of 150 minutes per week of moderate-  
65 intensity physical activity(8). In other words, activities that are intense enough to breathe heavily  
66 and break a sweat. With movement challenges and NMS experienced by people living with PD,  
67 moving fast or long enough to reach recommended targets may be hard. As a consequence,  
68 people with PD often lead sedentary lifestylesClick or tap here to enter text.(9)(10), which can have  
69 adverse short- and long-term effects on their health (11).

70 1.2.“Sedentary behavior, characterized by activities in sitting or lying with minimal energy  
71 expenditure (12), is more prevalent in individuals with PD compared to age-matched adults (13).

72 For example, people with PD engage in approximately 10 hours of sedentary behaviors during  
73 waking hours, often in longer bouts compared to their age-matched peers without PD (13).

74 Notably, sedentary behavior is a well-established risk factor for chronic diseases such as  
75 diabetes, cancer, cardiovascular disease, and negatively affects mental health conditions like  
76 stress, anxiety, depression, and dementia (14). Understanding the potential association between  
77 sedentary behavior and non-motor symptoms in PD is crucial for identifying underlying  
78 mechanisms and improving symptom management (3)(13). Previous studies have shown positive  
79 effects of exercise on both motor and non-motor symptoms in PD(15), however exercise and

80 sedentary behaviour are distinct and independent factors (13)(16). Although a potential link  
81 between sedentary behaviour and cognitive impairment has been suggested in PD (13), clear  
82 associations between non-motor symptoms and sedentary behavior are yet to be established, but  
83 determining such links may help in better management of NMS. As the number of PD cases  
84 continues to rise globally, understanding and managing NMS are essential for improving the  
85 quality of life of individuals with PD (7). Understanding the distinctive associations between  
86 sedentary behavior and NMS could inform future interventions for PD (17)(18) (16).

87 In this paper, authors aim to review the literature for studies that highlight the associations  
88 between sedentary behavior (other search terms may include sitting/lying or physical inactivity)  
89 with non-motor symptoms in individuals living with PD. More specifically, authors will focus on  
90 the associations between non-motor symptoms related to mental health such as sleep quality,  
91 depression, and cognitive impairments with sedentary behavior in individuals living with PD.

## 92 **2. Methods**

### 93 2.1 Protocol and registration

94

95 In order to report this Systematic review, we used Preferred Reporting Items for Systematic  
96 Reviews and Meta-Analyses (PRISMA) statement (19) as shown in S1 Table. The protocol was  
97 registered with PROSPERO (ID: CRD42023405422).

### 98 2.2 Identification of relevant studies

99 A systematic search was conducted to identify all original peer-reviewed articles available on the  
100 association of sedentary behavior with non-motor symptoms, including sleep,  
101 depression/anxiety, and cognitive decline in Parkinson's disease until February 28, 2023. The  
102 search was performed on several databases, including MEDLINE, CINAHL, Scopus, and  
103 PubMed and PsycINFO using different combinations of search terms such as non-motor  
104 symptom\* OR depress\* OR anxiety OR mood AND/OR sleep\* OR insomnia\* OR sleep  
105 difficulties OR reduced sleep AND/OR cognitive decline, OR cognitive impairment OR  
106 sedentary AND sitting OR bed-ridden OR lying down OR physical inactivity OR lack OR  
107 minimal physical-activity, in different combinations with Parkinson's disease.

108 Next, all identified studies were transferred to Covidence software for screening.

109 The eligibility criteria were based on the PI(E)COS (participants, intervention (exposure),  
110 context, outcomes, and study design) framework(20). The original peer-reviewed articles were  
111 included if they met specific criteria. First, studies were selected if they included participants  
112 with PD who exhibited non-motor symptoms at the time of inclusion in the study. Second, the  
113 exposure of interest was sedentary behavior, as the primary focus of our study was to identify the  
114 association between non-motor symptoms and sedentary behavior. Regarding  
115 context/comparators, the comparator criterion was not applicable to our study. Patients from all  
116 settings, such as the community or hospitalized, were considered for inclusion in the study. In

117 terms of outcomes, all the included studies focused on the association between sedentary  
118 behavior and at least one of the non-motor symptoms, including depression, sleep quality, and/or  
119 cognitive impairment. Finally, all types of study designs were included as this is a relatively new  
120 area of study with limited available data. Therefore, all peer-reviewed articles written in English  
121 describing original quantitative research were included. Additionally, the reference lists of all  
122 eligible studies were carefully examined to identify any additional relevant studies.

### 123 **2.3. Selection of relevant studies**

124 Based on the eligibility criteria mentioned above, two independent reviewers screened the  
125 articles for selection. At first, the title and abstract screening was performed which was followed  
126 by the full-text screening. All conflicts between the two reviewers were discussed and resolved  
127 by the third reviewer and a consensus was reached.

### 128 **2.4. Data Synthesis**

129 The data from the selected studies were extracted and organized using an Excel spreadsheet and  
130 Covidence software. The following information was collected: study number, title of study, first  
131 author, objective(s) of study, study design, year, country, number of participants, exposure  
132 setting, age, sex/gender, type of non-motor symptoms, type of test for non-motor symptom,  
133 measurement of sedentary behavior, main outcomes, secondary outcomes, key findings, and  
134 statistical analysis (available as supplementary material).

135 Due to factors such as small number of studies, variation in study designs of studies and  
136 methods, and heterogeneity, it was determined that a meta-analysis may not yield worthwhile  
137 results. Therefore, a narrative synthesis was conducted, following Popay' et al.'s instructions and  
138 suggestions (21) A tabulation format was chosen to describe the characteristics of included  
139 studies, the characteristics of participants, and the objectives and outcomes related to the  
140 association between sedentary behavior and non-motor symptoms. The protocol for the  
141 systematic review was registered on PROSPERO (ID: CRD42023405422) on April 11, 2023.

## 142 2.5. Quality assessment

143 After retrieving the studies that met inclusion criteria, two authors independently assessed the  
144 methodological quality of studies using New Castle-Ottawa scale (NOS)(22).

145 For the longitudinal studies Newcastle Ottawa scale for cohort studies was used. For cross  
146 sectional studies, quality Appraisal was performed studies Newcastle-Ottawa Scale adapted for  
147 cross-sectional studies. Studies scoring 5 or more were considered to be good quality  
148 studies(22,23).

## 149 3. Results

150 Out of 463 articles, 183 duplicate articles were removed, leaving 280 studies. Of these, 243 were  
151 considered irrelevant, and 37 studies underwent full-text screening. Finally, 7  
152 studies(13)(24)(25)(26)(27)(28)(29) were found eligible for systematic review and included in the  
153 data extraction and narrative synthesis. The selection process is summarized in a PRISMA  
154 flowchart (Figure 1).

155 **Figure 1.** Depicting the PRISMA Steps followed to select articles for the current study.



156 Table 1 shows the characteristics of the included studies, while Table 2 presents the  
157 characteristics of people with PD. All 7 studies selected were observational studies, with three  
158 being cross-sectional and three being secondary analyses of longitudinal cohort studies. While  
159 one of them was exploratory observational study. Five studies were conducted in the USA, and  
160 the remaining two were done in the United Kingdom. Total number of cases across all studies  
161 were 980 (excluding controls). Notably, all the studies were conducted within the last decade,  
162 reflecting the emerging trend in research to better understand the relationship between sedentary  
163 behavior and non-motor symptoms in PD. Six studies assessed the correlation of sedentary  
164 behavior and cognition, with two studies including an assessment of depression in addition to  
165 cognition. Only one study studied the link between sedentary behavior and sleep. The studies  
166 were primarily carried out in community settings, except for one that was conducted in a home-  
167 based setting.

168 The studies were further categorized into three groups based on the non-motor symptoms studied  
169 as follows:

### 170 3.1 Sedentary Behaviour and Cognitive Changes in Parkinson's Disease

171 Out of the seven studies, six investigated the impact of sedentary behavior on cognition

172 (13)(27)(26)(24)(25)(28). Three of these studies focused exclusively on cognition(28)(27)(25), while

173 the other three assessed depression and other factors in addition to cognition(13)(26)(24). All the

174 studies were observational studies encompassing different study designs. It was consistently

175 reported by all six studies that a sedentary lifestyle was associated with cognitive decline in

176 PD(13)(27)(Timblin et al., 2022) (Timblin et al., 2022)(24)(25)(28). Interesting variations were

177 observed in the aspects of this relationship investigated by the different studies. One study found  
178 an association between sedentary behavior and an elevated risk of developing PD-related mild  
179 cognitive impairment and dementia(25). Another study noted that as leisure/recreational physical  
180 activities declined over time, the risk of developing PD-related dementia increased (25).  
181 Similarly, another study reported that sedentary behavior in individuals with PD resulted in  
182 overall poor health, particularly worse in those with cognitive decline (28). A study by Troutman  
183 et al. reported that sedentary activity negatively affected cognition in general, particularly  
184 attention, and also led to reduced cognitive processing and communication, resulting in a poorer  
185 quality of life (27). These studies highlighted the cumulative detrimental effects of sedentary  
186 behavior and physical inactivity on cognition in PD, subsequently lowering the quality of life of  
187 people with PD (13)(24).

### 188 3.2 Sedentary Behavior and Depression/Anxiety in Parkinson's disease

189 Two studies assessed depression in addition to the cognitive impairment in individuals with  
190 PD(26)(24). One study reported that depression led to sedentary behavior, which in turn, led to  
191 cognitive decline over time(26). This suggests that lack of physical activity might play a role in  
192 depression and its eventual impact on cognitive decline(26). Similarly, another study determined  
193 that PD patients benefit from being physically active, while long periods of sedentary behaviour  
194 may contribute to the etiology of depression(24). Being physically active not only improved  
195 quality of life but may also helped in the prevention and therapy for depression in PD (24).

### 196 **3.3 Sedentary behavior and sleep deficits in Parkinson's disease**

197 Only one study assessed the association between sleep and sedentary behaviour in PD(29). The  
198 study reported that individuals with mild PD slept less and were less active compared to a group  
199 of healthy older adults. Of note, in both groups, less sleep was related to more sedentary  
200 behaviour (29).

### 201 **3.4 Factors contributing to Sedentary behaviour in Parkinson's disease.**

202 It is well-established that motor symptoms typically lead to physical inactivity in PD(30).  
203 However, it is crucial to highlight here that lack of physical activity is associated with cognitive  
204 impairment independent of the severity of motor symptoms (25). One study reported an  
205 association between sedentary behavior and cognitive decline in patients newly diagnosed with  
206 PD, when motor symptoms are less severe (25). These findings make it difficult to establish  
207 causation. Moreover, it has been reported that mood and thought disorders such as apathy and  
208 anxiety may increase the risk of physical inactivity (26). Additionally, factors such as female  
209 gender, older age, and a decline in overall physical capacity are important determinants of  
210 sedentary behavior (31).

### 211 **3.5 Quality Appraisal**

212 Using the Newcastle-Ottawa Scale, six out of the seven studies received a rating of good quality  
213 (score > 5), while one study was rated as moderate quality (score < 5), as illustrated in Figures 2a

214 and 2b. Among the six studies rated as good quality, three were cross-sectional, while the  
215 remaining three were longitudinal studies.

216 **Figure 2a. Figure 2.a.** Quality Appraisal for longitudinal studies using New Castle Ottawa

217 Scale:

218 Study acquiring at least 5 stars, or more is considered good quality. Three main categories

219 Selection, Comparability and Outcomes with further subdivisions.

220 Selection 1) Representativeness of the exposed cohort a) Truly representative (one star) b)

221 Somewhat representative (one star) c) No star for: elected group d) No description of the

222 derivation of the cohort 2) Selection of the non-exposed cohort a) Drawn from the same

223 community as the exposed cohort (one star) No star for: b) Drawn from a different source c) No

224 description of the derivation of the non exposed cohort 3) Ascertainment of exposure a) Secure

225 record (e.g., surgical record) (one star) b) Structured interview (one star) No star for: c) Written

226 self report d) No description e) Other 4) Demonstration that outcome of interest was not present

227 at start of study a) Yes (one star) No star if: b) No Comparability 1) Comparability of cohorts

228 on the basis of the design or analysis controlled for confounders a) The study controls for age,

229 sex and marital status (one star) b) Study controls for other factors (list) (one star) No star if: c)

230 Cohorts are not comparable on the basis of the design or analysis controlled for confounders

231 Outcome 1) Assessment of outcome a) Independent blind assessment (one star) b) Record

232 linkage (one star) c) No star for: Self report d) No description e) Other 2) Was follow-up long  
233 enough for outcomes to occur a) Yes (one star) b) No Indicate the median duration of follow-up  
234 and a brief rationale for the assessment above: 3) Adequacy of follow-up of cohorts a) Complete  
235 follow up- all subject accounted for (one star) b) Subjects lost to follow up unlikely to introduce  
236 bias- number lost less than or equal to 20% or description of those lost suggested no different  
237 from those followed. (One star) No star for: c) Follow up rate less than 80% and no description  
238 of those lost d) No statement.

239 \* **Figure 2.b.** Quality Appraisal for case-control studies Newcastle-Ottawa Scale adapted for  
240 cross-sectional studies.

241 Study acquiring at least 5 stars, or more is considered good quality. Three main categories  
242 Selection, Comparability and Outcomes with further subdivisions.

243 Selection: (Maximum 5 scores) 1) Representativeness of the cases: a) Truly representative of the  
244 HCC patients (consecutive or random sampling of cases). 1 star b) Somewhat representative of  
245 the average in the HCC patients (non-random sampling). 1 star. No star for: c) Selected  
246 demographic group of users. d) No description of the sampling strategy. 2) Sample size: a)  
247 Justified and satisfactory ( $\geq 400$  HCC included). 1 star. No star for: b) Not justified ( $<400$  HCC  
248 patients included). 3) Non-Response rate a) The response rate is satisfactory ( $\geq 95\%$ ). 1 Star. No  
249 star if: b) The response rate is unsatisfactory ( $<95\%$ ), or no description. 4) Ascertainment of the

250 screening/surveillance tool: a) Validated screening/surveillance tool. 2-star b) non-validated  
251 screening/surveillance tool, but the tool is available or described. 1 star. No star if: No  
252 description of the measurement tool. Comparability: (Maximum 1 stars) 1) The potential  
253 confounders were investigated by subgroup analysis or multivariable analysis. a) The study  
254 investigates potential confounders. 1 tar. No star if: b) The study does not investigate potential  
255 confounders. Outcome: (Maximum 3 stars) 1) Assessment of the outcome: a) Independent blind  
256 assessment. 2 stars b) Record linkage. 2 stars c) Self report. 1 Star. No star if d) No description.  
257 2) Statistical test: a) The statistical test used to analyze the data is clearly described and  
258 appropriate. 1 star. No star if: b) The statistical test is not appropriate, not described or  
259 incomplete.  
260 \*: star, -: no star  
261 : star, -: no star

262  
263

#### 264 4. Discussion

265 There is substantial evidence that physical activity is highly beneficial for individuals with PD,  
266 potentially delaying or slowing down the disease progression (32)(33). Exercise has also been  
267 demonstrated to improve non-motor symptoms of PD (34). However, it is important to recognize

268 that sedentary behavior is not merely the opposite of physical activity or exercise, but an  
269 independent behavior that is associated with adverse health outcomes(13)(14). The unique  
270 relationship between sedentary behavior and non-motor symptoms of PD has been suggested by  
271 some researchers(13)(35). Yet, a clearer understanding of this relationship is required,  
272 considering that the prevalence of PD is increasing, and technological advances may encourage  
273 even more sedentary behaviors. Although in recent years, this gap has been highlighted(36). It  
274 has been suggested that sedentary behavior and its role in non-motor symptoms is uniquely  
275 essential (13). Hence in the context of PD, further understanding of sedentary behavior and its  
276 objective measurements would provide another additional dimension, further understanding of  
277 which is crucial to determine further gaps that can be filled, subsequently enabling researchers to  
278 provide enhanced therapeutic strategies for individuals living with PD.

279 In this study, we specifically examined the association between sedentary behavior and three  
280 non-motor symptoms namely cognitive impairment, depression and sleep in the context of PD. A  
281 brief discussion on each one of them follows.

#### 282 **4.1. Association of Sedentary behavior and Cognition in Parkinson's disease**

283 Cognitive impairment is a common, non-motor symptom of PD, with a wide spectrum of  
284 symptoms related to attention, working memory, visuospatial, and executive functioning (37)(38).  
285 The symptoms related to impaired cognition may include worsening of attention, problems with,

286 difficulties with (37)(38). The underlying mechanisms contributing to cognitive decline in PD are  
287 complex and may involve genetic factors such as  $\alpha$ -synuclein toxicity, Lewy body accumulation,  
288 synaptic changes, inflammatory process, and neurotransmitter disruptions (17)(37)(38)(39).  
289 Pharmacological interventions are typically used to target these changes in order to enhance  
290 cognition, however, the overall improvement remains modest(38). In addition to pharmacological  
291 strategies, non-pharmacological strategies, such as physical activity, have been shown to  
292 improve various biological mechanisms related to cognition in individuals with PD(37)(38). Thus  
293 physical activity is a promising approach in improving cognition in PD(40). Importantly, a  
294 distinctive and independent association between cognitive impairment in PD and sedentary  
295 behavior has also been suggested,(13)(26) however, yet to investigated in depth. We found  
296 studies (Table 1) assessing this link and all of them reported a negative impact of sedentary  
297 behavior on cognition. Studies have shown that sedentary behavior can be related with poor  
298 global cognition, and cognitive decline(26,28). Furthermore, a prolonged sedentary behavior  
299 causes a progress in cognitive decline.

#### 300 **4.2. Association of Sedentary Behavior and Depression in Parkinson's disease**

301 Depression is another common non-motor symptom in PD (41). Depression often manifests  
302 before the onset of motor symptoms, though it can occur at any stage of PD (41)(42).  
303 Approximately 40% of patients with PD experience symptoms of depression (42). These  
304 symptoms may include excessive feeling of sadness, helplessness, lack of concentration, loss of



305 interest in previously enjoyed activities, increased exhaustion, irritability, and dysphoria.

306 Diagnosing depression in PD can be challenging due to symptom overlap with PD symptoms,  
307 leading to the condition being untreated in some individuals living with PD(41)(42). Depressive  
308 disturbances not only cause emotional burdens, but also have a significant negative impact on  
309 quality of life(42). Moreover, depression also negatively affects motor symptoms, and worsens  
310 cognitive and functional disabilities(24)(42). It is noteworthy that depression along with anxiety  
311 are among the non-motor symptoms that are considered to be the most important predictors of  
312 quality of life in individuals with PD(24)(43).

313 The pathophysiology of depression in PD is not fully understood(41)(43). Various studies suggest  
314 that depression in PD could be related to dysfunction of multiple brain areas, such as subcortical  
315 nuclei as well as prefrontal cortex, striatal–thalamic–prefrontal and bitemporal limbic circuits.

316 Also, degenerative changes in neurotransmitter systems of the brain may play a role(41)(43).

317 Psychosocial factors have also been suggested to contribute to the etiology of depression in PD  
318 (41)(43)(42). Another factor less studied attributed to depression in PD is sedentary behavior (33).

319 One study evaluating the role of physical activity in PD showed that patients with prolonged  
320 sedentary behavior displayed more apathetic behavior as compared to others who are active (33).

321 Other studies have also demonstrated a link between physical inactivity and an increased  
322 likelihood of depression in PD (26)(14)(34). In this review, we found only two studies that

323 assessed the link between depression and sedentary behavior (26)(24). Both studies reported a  
324 potential link between depression and sedentary behavior which may also contribute to cognitive  
325 decline(26)(24).

### 326 4.3. Association of Sedentary Behavior and Sleep in Parkinson's disease

327 Sleep-related disorders are highly prevalent in PD (44), and constitute an integral part of  
328 spectrum of non-motor symptoms of PD (45). These sleep disorders may present earlier in the  
329 course of disease (44). The etiology of sleep disturbances in PD is multifactorial and may include  
330 PD-related neurodegenerative processes and medication side-effects(46). A diverse array of  
331 sleep disorders is associated with PD, ranging from poor sleep quality, fragmented sleep,  
332 reduction in total sleep time, and overall sleep and rapid eye movement behavior disorders (3).  
333 Sleep disturbances significantly impact the quality of life in individuals with PD and tend to  
334 worsen as the disease progresses(46). In addition, sleep problems may also have a negative effect  
335 on the severity of motor and other non-motor symptoms, making effective treatment crucial  
336 (3)(46). Various therapeutic interventions are being investigated to improve sleep in PD,  
337 including exercise and physical activity, which have been shown promising results in improving  
338 sleep quality(Amara and Memon, 2018. Interestingly, studies have demonstrated an independent  
339 relationship between reduced sleep and sedentary behavior in PD (29). It has been suggested that  
340 treating sleep deficits may lead to a decline in sedentary behavior in the early stages of PD (5).  
341 This indicates the potential bidirectional relationship between sleep and sedentary behavior in

342 PD. Although research on this topic is limited, it has been demonstrated that an independent and  
343 unique link exists between sedentary behavior and poor sleep quality(29).

#### 344 **4.4 Limitations**

345 It is important to note that the evidence provided in this paper is not without limitations. A meta-  
346 analysis was not performed due to the heterogeneity of methods across the studies. Furthermore,  
347 studies included in this paper were collected from peer-reviewed journals via electronic  
348 databases. Thus, studies selected for this paper could potentially be subject to publication bias.  
349 Finally, data extraction and quality assessment were performed by one reviewer, hence the  
350 possibility of conceptual bias can not be excluded.

#### 351 **5. Future Goals and Directions**

352 It is now well-established that non-motor symptoms of PD are a major contributor to the reduced  
353 quality of life in individuals living with PD(3,39). Despite often preceding the motor symptoms,  
354 non-motor symptoms have not received sufficient attention and remain undertreated (48).  
355 Currently, various pharmacological as well as non-pharmacological treatments are being  
356 investigated for both motor and non-motor symptoms of PD (18). Exercise has emerged as a  
357 promising non-pharmacological approach for improving not only motor symptoms but also non-  
358 motor symptoms(14). However, it is essential to recognize that sedentary behavior is an  
359 independent risk factor for poor health outcomes (16). Individuals with PD often lead sedentary  
360 lifestyles, making it crucial to assess its specific role in the pathophysiology of non-motor  
361 symptoms in PD in more depth. (13)Emerging research has highlighted the unique and crucial

362 role of sedentary behavior in PD(13). For example, it has been demonstrated that individuals with  
363 PD tend to have longer bouts of sedentary behavior compared to their age-matched controls,  
364 suggesting a clear change in their pattern of sedentary behavior (49).

365 Despite its potential significance, current data on the role of sedentary behaviour in PD,  
366 particularly in the context of non-motor symptoms, is severely limited. Only 7 studies were  
367 found relevant to our topic, indicating the need for further investigation in this area. A clearer  
368 understanding of the relationship between sedentary behavior and non-motor symptoms may  
369 help to establish better biomarkers of the disease at an earlier stage, leading to more effective  
370 therapies for PD.

371 Future studies using more objective device-based, larger sample sizes, clear definition of  
372 sedentary behavior, and improved study designs are warranted as they may provide a better and  
373 clearer insight into the consequences of sedentary behavior and its potential implications in the  
374 non-motor symptoms of PD. In conclusion, while exercise has shown promise in addressing  
375 motor and non-motor symptoms in PD, the specific impact of sedentary behavior on the disease  
376 remains an important area for further research. Understanding the role of sedentary behavior in  
377 PD may open new avenues for therapeutic interventions and lead to improved outcomes for  
378 individuals living with the disease.

379

## 380 **References:**

- 381 1. Poewe W, Seppi K, Tanner CM, Halliday GM, Brundin P, Volkman J, et al. Parkinson disease. *Nat*  
382 *Rev Dis Primers*. 2017 Mar 23;3(1):17013.
- 383 2. Schiess N, Cataldi R, Okun MS, Fothergill-Misbah N, Dorsey ER, Bloem BR, et al. Six Action Steps  
384 to Address Global Disparities in Parkinson Disease. *JAMA Neurol*. 2022 Sep 1;79(9):929.
- 385 3. Chaudhuri KR, Healy DG, Schapira AHV. Non-motor symptoms of Parkinson's disease: diagnosis  
386 and management. *Lancet Neurol*. 2006 Mar 1;5(3):235–45.
- 387 4. Sung VW, Nicholas AP. Nonmotor Symptoms in Parkinson's Disease. *Neurol Clin*. 2013  
388 Aug;31(3):S1–16.
- 389 5. Todorova A, Jenner P, Ray Chaudhuri K. Non-motor Parkinson's: integral to motor Parkinson's,  
390 yet often neglected. *Pract Neurol*. 2014 Oct;14(5):310–22.
- 391 6. Müller B, Assmus J, Herlofson K, Larsen JP, Tysnes OB. Importance of motor vs. non-motor  
392 symptoms for health-related quality of life in early Parkinson's disease. *Parkinsonism Relat*  
393 *Disord*. 2013 Nov;19(11):1027–32.
- 394 7. Hermanowicz N, Jones SA, Hauser RA. *Impact of non-motor symptoms in Parkinson's disease:*  
395 *a PMDAAlliance survey*. *Neuropsychiatr Dis Treat*. 2019 Aug;Volume 15:2205–12.
- 396 8. Bouça-Machado R, Duarte GS, Patriarca M, Castro Caldas A, Alarcão J, Fernandes RM, et al.  
397 Measurement Instruments to Assess Functional Mobility in Parkinson's Disease: A Systematic  
398 Review. *Mov Disord Clin Pract*. 2020 Feb 11;7(2):129–39.
- 399 9. Bouça-Machado R, Rosário A, Caldeira D, Castro Caldas A, Guerreiro D, Venturelli M, et al.  
400 Physical Activity, Exercise, and Physiotherapy in Parkinson's Disease: Defining the Concepts. *Mov*  
401 *Disord Clin Pract*. 2020 Jan 11;7(1):7–15.
- 402 10. Ryder-Burbidge C, Wieler M, Nykiforuk CIJ, Jones CA. Life-Space Mobility and Parkinson's Disease.  
403 A Multiple-Methods Study. *Mov Disord Clin Pract*. 2022 Apr 19;9(3):351–61.
- 404 11. Biswas A, Oh PI, Faulkner GE, Bajaj RR, Silver MA, Mitchell MS, et al. Sedentary Time and Its  
405 Association With Risk for Disease Incidence, Mortality, and Hospitalization in Adults. *Ann Intern*  
406 *Med*. 2015 Jan 20;162(2):123–32.
- 407 12. Tremblay MS, Aubert S, Barnes JD, Saunders TJ, Carson V, Latimer-Cheung AE, et al. Sedentary  
408 Behavior Research Network (SBRN) – Terminology Consensus Project process and outcome.  
409 *International Journal of Behavioral Nutrition and Physical Activity*. 2017 Dec 10;14(1):75.
- 410 13. Ellingson LD, Zaman A, Stegemöller EL. Sedentary Behavior and Quality of Life in Individuals With  
411 Parkinson's Disease. *Neurorehabil Neural Repair*. 2019 Aug 18;33(8):595–601.

- 412 14. Bélair MA, Kohen DE, Kingsbury M, Colman I. Relationship between leisure time physical activity,  
413 sedentary behaviour and symptoms of depression and anxiety: evidence from a population-  
414 based sample of Canadian adolescents. *BMJ Open*. 2018 Oct 17;8(10):e021119.
- 415 15. Osborne JA, Botkin R, Colon-Semenza C, DeAngelis TR, Gallardo OG, Kosakowski H, et al.  
416 Correction to: Osborne JA, Botkin R, Colon-Semenza C, et al. Physical Therapist Management of  
417 Parkinson Disease: A Clinical Practice Guideline From the American Physical Therapy Association.  
418 *Phys Ther*. 2022;102:pzab302. <https://doi.org/10.1093/ptj>. *Phys Ther*. 2022 Aug 1;102(8).
- 419 16. Thorp AA, Owen N, Neuhaus M, Dunstan DW. Sedentary Behaviors and Subsequent Health  
420 Outcomes in Adults. *Am J Prev Med*. 2011 Aug;41(2):207–15.
- 421 17. Dickson DW, Fujishiro H, Orr C, DelleDonne A, Josephs KA, Frigerio R, et al. Neuropathology of  
422 non-motor features of Parkinson disease. *Parkinsonism Relat Disord*. 2009 Dec;15:S1–5.
- 423 18. Iarkov A, Barreto GE, Grizzell JA, Echeverria V. Strategies for the Treatment of Parkinson’s  
424 Disease: Beyond Dopamine. *Front Aging Neurosci*. 2020 Jan 31;12.
- 425 19. Page MJ, McKenzie JE, Bossuyt PM, Boutron I, Hoffmann TC, Mulrow CD, et al. The PRISMA 2020  
426 statement: An updated guideline for reporting systematic reviews. *International Journal of*  
427 *Surgery*. 2021 Apr;88:105906.
- 428 20. O’Connor D, Green S, Higgins JP. Defining the Review Question and Developing Criteria for  
429 Including Studies. In: *Cochrane Handbook for Systematic Reviews of Interventions*. Chichester,  
430 UK: John Wiley & Sons, Ltd; p. 81–94.
- 431 21. Popay J, Roberts H, Sowden A, Petticrew M, Arai L, Rodgers M, Britten N, Roen K, Duffy S:  
432 Guidance on the conduct of narrative synthesis in systematic reviews.
- 433 22. Luchini C, Stubbs B, Solmi M, Veronese N. Assessing the quality of studies in meta-analyses:  
434 Advantages and limitations of the Newcastle Ottawa Scale. *World J Metaanal*. 2017;5(4):80.
- 435 23. Khan A, Feulefack J, Sergi CM. Pre-conceptional and prenatal exposure to pesticides and pediatric  
436 neuroblastoma. A meta-analysis of nine studies. *Environ Toxicol Pharmacol*. 2022 Feb;90:103790.
- 437 24. van Uem JMT, Cerff B, Kampmeyer M, Prinzen J, Zuidema M, Hobert MA, et al. The association  
438 between objectively measured physical activity, depression, cognition, and health-related quality  
439 of life in Parkinson’s disease. *Parkinsonism Relat Disord*. 2018 Mar;48:74–81.
- 440 25. Jones JD, Baxter F, Timblin H, Rivas R, Hill CR. Physical inactivity is associated with Parkinson’s  
441 disease mild cognitive impairment and dementia. *Ment Health Phys Act*. 2022 Oct;23:100461.
- 442 26. Timblin H, Rahmani E, Ryczek CA, Hill CR, Jones JD. Physical inactivity links depressive symptoms  
443 and cognitive functioning among individuals with Parkinson’s disease. *Neuropsychology*. 2022  
444 Sep;36(6):505–12.
- 445 27. Troutman SBW, Erickson KI, Grove G, Weinstein AM. Sedentary Time is Associated with Worse  
446 Attention in Parkinson’s Disease: A Pilot Study. *J Mov Disord*. 2020 May 31;13(2):146–9.

- 447 28. Sulzer P, Gräber S, Schaeffer E, van Lummel R, Berg D, Maetzler W, et al. Cognitive impairment  
448 and sedentary behavior predict health-related attrition in a prospective longitudinal Parkinson's  
449 disease study. *Parkinsonism Relat Disord*. 2021 Jan;82:37–43.
- 450 29. Prusynski RA, Kelly VE, Fogelberg DJ, Pradhan S. The association between sleep deficits and  
451 sedentary behavior in people with mild Parkinson disease. *Disabil Rehabil*. 2022 Sep  
452 11;44(19):5585–91.
- 453 30. Bryant MS, Hou JG, Collins RL, Protas EJ. Contribution of Axial Motor Impairment to Physical  
454 Inactivity in Parkinson Disease. *Am J Phys Med Rehabil*. 2016 May;95(5):348–54.
- 455 31. Dontje ML, de Greef MHG, Speelman AD, van Nimwegen M, Krijnen WP, Stolk RP, et al.  
456 Quantifying daily physical activity and determinants in sedentary patients with Parkinson's  
457 disease. *Parkinsonism Relat Disord*. 2013 Oct;19(10):878–82.
- 458 32. Bhalsing KS, Abbas MM, Tan LCS. Role of Physical Activity in Parkinson's Disease. *Ann Indian Acad  
459 Neurol*. 2018;21(4):242–9.
- 460 33. Sacheli MA, Murray DK, Vafai N, Cherkasova M V., Dinelle K, Shahinfard E, et al. Habitual  
461 exercisers versus sedentary subjects with Parkinson's Disease: Multimodal PET and fMRI study.  
462 *Movement Disorders*. 2018 Dec;33(12):1945–50.
- 463 34. Domingos J, Família C, Fernandes JB, Dean J, Godinho C. Is Being Physically Active Enough or Do  
464 People with Parkinson's Disease Need Structured Supervised Exercise? Lessons Learned from  
465 COVID-19. *Int J Environ Res Public Health*. 2022 Feb 19;19(4):2396.
- 466 35. Miura K, Takashima S, Matsui M, Tanaka K. Low Frequency of Leisure-Time Activities Correlates  
467 with Cognitive Decline and Apathy in Patients with Parkinson's Disease. *Advances in Parkinson's  
468 Disease*. 2014;03(03):15–21.
- 469 36. Benka Wallén M, Franzén E, Nero H, Hagströmer M. Levels and Patterns of Physical Activity and  
470 Sedentary Behavior in Elderly People With Mild to Moderate Parkinson Disease. *Phys Ther*. 2015  
471 Aug 1;95(8):1135–41.
- 472 37. Aarsland D, Creese B, Politis M, Chaudhuri KR, ffytche DH, Weintraub D, et al. Cognitive decline in  
473 Parkinson disease. *Nat Rev Neurol*. 2017 Apr 3;13(4):217–31.
- 474 38. Aarsland D, Batzu L, Halliday GM, Geurtsen GJ, Ballard C, Ray Chaudhuri K, et al. Parkinson  
475 disease-associated cognitive impairment. *Nat Rev Dis Primers*. 2021 Jul 1;7(1):47.
- 476 39. Grinberg LT, Rueb U, Alho AT di L, Heinsen H. Brainstem pathology and non-motor symptoms in  
477 PD. *J Neurol Sci*. 2010 Feb;289(1–2):81–8.
- 478 40. Loprinzi PD, Danzl MM, Ulanowski E, Paydo C. A pilot study evaluating the association between  
479 physical activity and cognition among individuals with Parkinson's disease. *Disabil Health J*. 2018  
480 Jan;11(1):165–8.
- 481 41. Lubomski M, Davis RL, Sue CM. Depression in Parkinson's disease: Perspectives from an  
482 Australian cohort. *J Affect Disord*. 2020 Dec;277:1038–44.

- 483 42. Laux G. Parkinson and depression: review and outlook. *J Neural Transm.* 2022 Jun 4;129(5–  
484 6):601–8.
- 485 43. Ryan M, Eatmon C V., Slevin JT. Drug treatment strategies for depression in Parkinson disease.  
486 *Expert Opin Pharmacother.* 2019 Jul 24;20(11):1351–63.
- 487 44. Lajoie AC, Lafontaine AL, Kaminska M. The Spectrum of Sleep Disorders in Parkinson Disease.  
488 *Chest.* 2021 Feb;159(2):818–27.
- 489 45. Kutscher SJ, Farshidpanah S, Claassen DO. Sleep Dysfunction and its Management in Parkinson’s  
490 Disease. *Curr Treat Options Neurol.* 2014 Aug 17;16(8):304.
- 491 46. Comella CL. Sleep Disorders in Parkinson’s Disease. *Sleep Med Clin.* 2008 Sep;3(3):325–35.
- 492 47. Amara AW, Memon AA. Effects of Exercise on Non-motor Symptoms in Parkinson’s Disease. *Clin*  
493 *Ther.* 2018 Jan;40(1):8–15.
- 494 48. Titova N, Chaudhuri KR. Non-motor Parkinson disease: new concepts and personalised  
495 management. *Medical Journal of Australia.* 2018 May 21;208(9):404–9.
- 496 49. Chastin SFM, Baker K, Jones D, Burn D, Granat MH, Rochester L. The pattern of habitual  
497 sedentary behavior is different in advanced Parkinson’s disease. *Movement Disorders.* 2010 Oct  
498 15;25(13):2114–20.
- 499



500

501

502

503

504

505

506

507

508

509

510

512 **Table 1**

| Author, publication year      | Country        | Study Design    | Objective                                                                                                                                                 | Non-motor-symptom     | Type of Test for Non-Motor symptom                             | Means of measuring inactivity    | Intervention Duration | Clinical Outcomes                                                                                                                                                         |
|-------------------------------|----------------|-----------------|-----------------------------------------------------------------------------------------------------------------------------------------------------------|-----------------------|----------------------------------------------------------------|----------------------------------|-----------------------|---------------------------------------------------------------------------------------------------------------------------------------------------------------------------|
| van Uem JMT et al, 2018, (24) | United Kingdom | Cross sectional | To investigate the association between amount of physical activity, severity of depression, cognitive function and quality of life in Parkinson's disease | Cognition, Depression | MMSE for cognition, Geriatric Depression Scale for depression, | Accelerometers on the lower back | 3 consecutive days    | Long bouts of sedentary behavior should be avoided in Parkinson's diseases. physical activity aids in prevention and treatment of depression and improves quality of life |

|                               |     |                              |                                                                                                                                           |           |                                                                                            |                                                                |           |                                                                                                                                                                                  |
|-------------------------------|-----|------------------------------|-------------------------------------------------------------------------------------------------------------------------------------------|-----------|--------------------------------------------------------------------------------------------|----------------------------------------------------------------|-----------|----------------------------------------------------------------------------------------------------------------------------------------------------------------------------------|
| Ellingson LD et al, 2019,(13) | USA | Cross-sectional              | To investigate the relationships between sedentary behaviors and markers of quality of life specific to Parkinson's disease               | Cognition | Parkinson's Disease Questionnaire-39 (PDQ-39)                                              | ActiGraph and activPAL<br><br>Sedentary Behavior Questionnaire | 1 week    | Sedentary behavior has a negative impact on quality of life, especially in domains of mobility and cognition in Parkinson's disease                                              |
| Troutman SBW et al, 2020,(27) | USA | Cross-sectional study, Pilot | To investigate the relationship between sedentary time and cognitive performance in individuals with mild-to-moderate Parkinson's disease | Cognition | Montreal Cognitive Assessment (MoCA), Parkinson's Disease-Cognitive Rating Scale (PD-CRS). | Armband accelerometer                                          | 7-10 days | Sedentary activity is likely to have a unique associations with cognition, particularly attention, which is more than moderate to vigorous physical activity in individuals with |

|                     |                |                                                                                                             |                                                                                                                                            |           |                                                                                 |                                                |                                                                                   |                                                                                                                                                     |
|---------------------|----------------|-------------------------------------------------------------------------------------------------------------|--------------------------------------------------------------------------------------------------------------------------------------------|-----------|---------------------------------------------------------------------------------|------------------------------------------------|-----------------------------------------------------------------------------------|-----------------------------------------------------------------------------------------------------------------------------------------------------|
|                     |                |                                                                                                             |                                                                                                                                            |           |                                                                                 |                                                |                                                                                   | Parkinson's disease                                                                                                                                 |
| Jones JD, 2020,(25) | USA            | Secondary analysis using the Parkinson's Progression Markers Initiative, PPMI (a longitudinal cohort study) | To investigate the association between participating in everyday physical activity and clinical cognitive outcomes                         | Cognition | Neuropsychological tests                                                        | Physical Activity Scale for the Elderly (PASE) | 3 years<br><br>(Subjective self-report questionnaire)<br>No objective measurement | Less activity over the course of the time may increase the risk of mild cognitive impairment and dementia in individuals with Parkinson's disease   |
| Sulzer P,2021,(28)  | United Kingdom | Exploratory Observational                                                                                   | To investigate the long term impact of sedentary behavior and cognitive impairment in the home environment and its association to sickness | Cognition | Depression: Geriatric Depression Scale<br>Cognition: Neuropsychological testing | Accelerometers                                 | 4.3 years(mean)                                                                   | Long term sedentary behaviour is associated with overall poor health, may lead to depression, which may cause or worsen the cognitive impairment in |

|                         |     |                                                                                                            |                                                                                                                                       |                       |                                                                                                 |                                                |                                                                            |                                                                                                                                                      |
|-------------------------|-----|------------------------------------------------------------------------------------------------------------|---------------------------------------------------------------------------------------------------------------------------------------|-----------------------|-------------------------------------------------------------------------------------------------|------------------------------------------------|----------------------------------------------------------------------------|------------------------------------------------------------------------------------------------------------------------------------------------------|
|                         |     |                                                                                                            | and death in PD                                                                                                                       |                       |                                                                                                 |                                                |                                                                            | Parkinson's disease.                                                                                                                                 |
| Timblin H,2022 ,(26)    | USA | Secondary analysis using the Parkinson's Progression Markers Initiative, PPMI (a longitudinal cohort study | To investigate the long term role physical activity between depressive symptoms and cognition in individuals with Parkinson's disease | Cognition, Depression | Cognition: Neuropsychological testing<br><br>Depression: Geriatric Depression Scale– Short Form | Physical Activity Scale for the Elderly (PASE) | 5 Years (subjective self-report questionnaire)<br>No objective measurement | Individuals who became more depressed, became more physically inactive and gradually developed cognitive decline over 5-years in Parkinson's disease |
| Prusynski RA, 2022,(29) | USA | Secondary analysis of sleep data gathered during a prospective observational study                         | To investigate if an association exists between reduced sleep and decreased Physical activity at earlier stages of                    | Sleep                 | N/A                                                                                             | (Fitbit Charge HR)                             | 14 days                                                                    | Increased sedentary behaviour leads to reduced sleep in individuals with Parkinson's disease and healthy old individuals. While sleep                |

|  |  |  |                     |  |  |  |  |                                                                                         |
|--|--|--|---------------------|--|--|--|--|-----------------------------------------------------------------------------------------|
|  |  |  | Parkinson's disease |  |  |  |  | and physical activity are reduced in mild PD as compared to healthy old age individuals |
|--|--|--|---------------------|--|--|--|--|-----------------------------------------------------------------------------------------|

513 Characteristics of the Studies Included

514

515 **Table 2**

| Author, publication year      | Non motor symptom studied | Number of Participants (Intervention N) | Setting   | Age of patients          | Biological sex (Male/Female %) |
|-------------------------------|---------------------------|-----------------------------------------|-----------|--------------------------|--------------------------------|
| van Uem JMT et al, 2018, (24) | Depression, Cognition     | 47                                      | Home      | 65-74 (mean age 70)      | Male 74%, 26% female           |
| Ellingson LD et al,           | Cognition                 | 52                                      | Community | 59.9-75.7(mean age:67.8) | 56% were male, 44% female      |

|                                   |            |                        |           |                        |                            |
|-----------------------------------|------------|------------------------|-----------|------------------------|----------------------------|
| 2019,(<br>13)                     |            |                        |           |                        |                            |
| Troutman SBW et al, 2020,(<br>27) | Cognition  | 17                     | Community | 50-80 (mean age:65.07) | 82% male, 18% female.      |
| Jones JD, 2020,(<br>25)           | Cognition  | 307                    | Community | 40-80 (mean age:61)    | 65.8 %male,34.2% female    |
| Sulzer P,2021,(<br>28)            | Cognition  | 45 study completed:20. | Community | 44-80(mean age: 67.5)  | (78%) male 12% females     |
| Timblin H,2022 ,(26)              | Depression | 487                    | Community | 33-84 (mean age: 61)   | 65.1% male, 34.1 % females |

|                         |       |    |           |               |               |
|-------------------------|-------|----|-----------|---------------|---------------|
| Prusynski RA, 2022,(29) | Sleep | 25 | Community | 69 (mean age) | not specified |
|-------------------------|-------|----|-----------|---------------|---------------|

516 Characteristics of the Patients Included in the study.



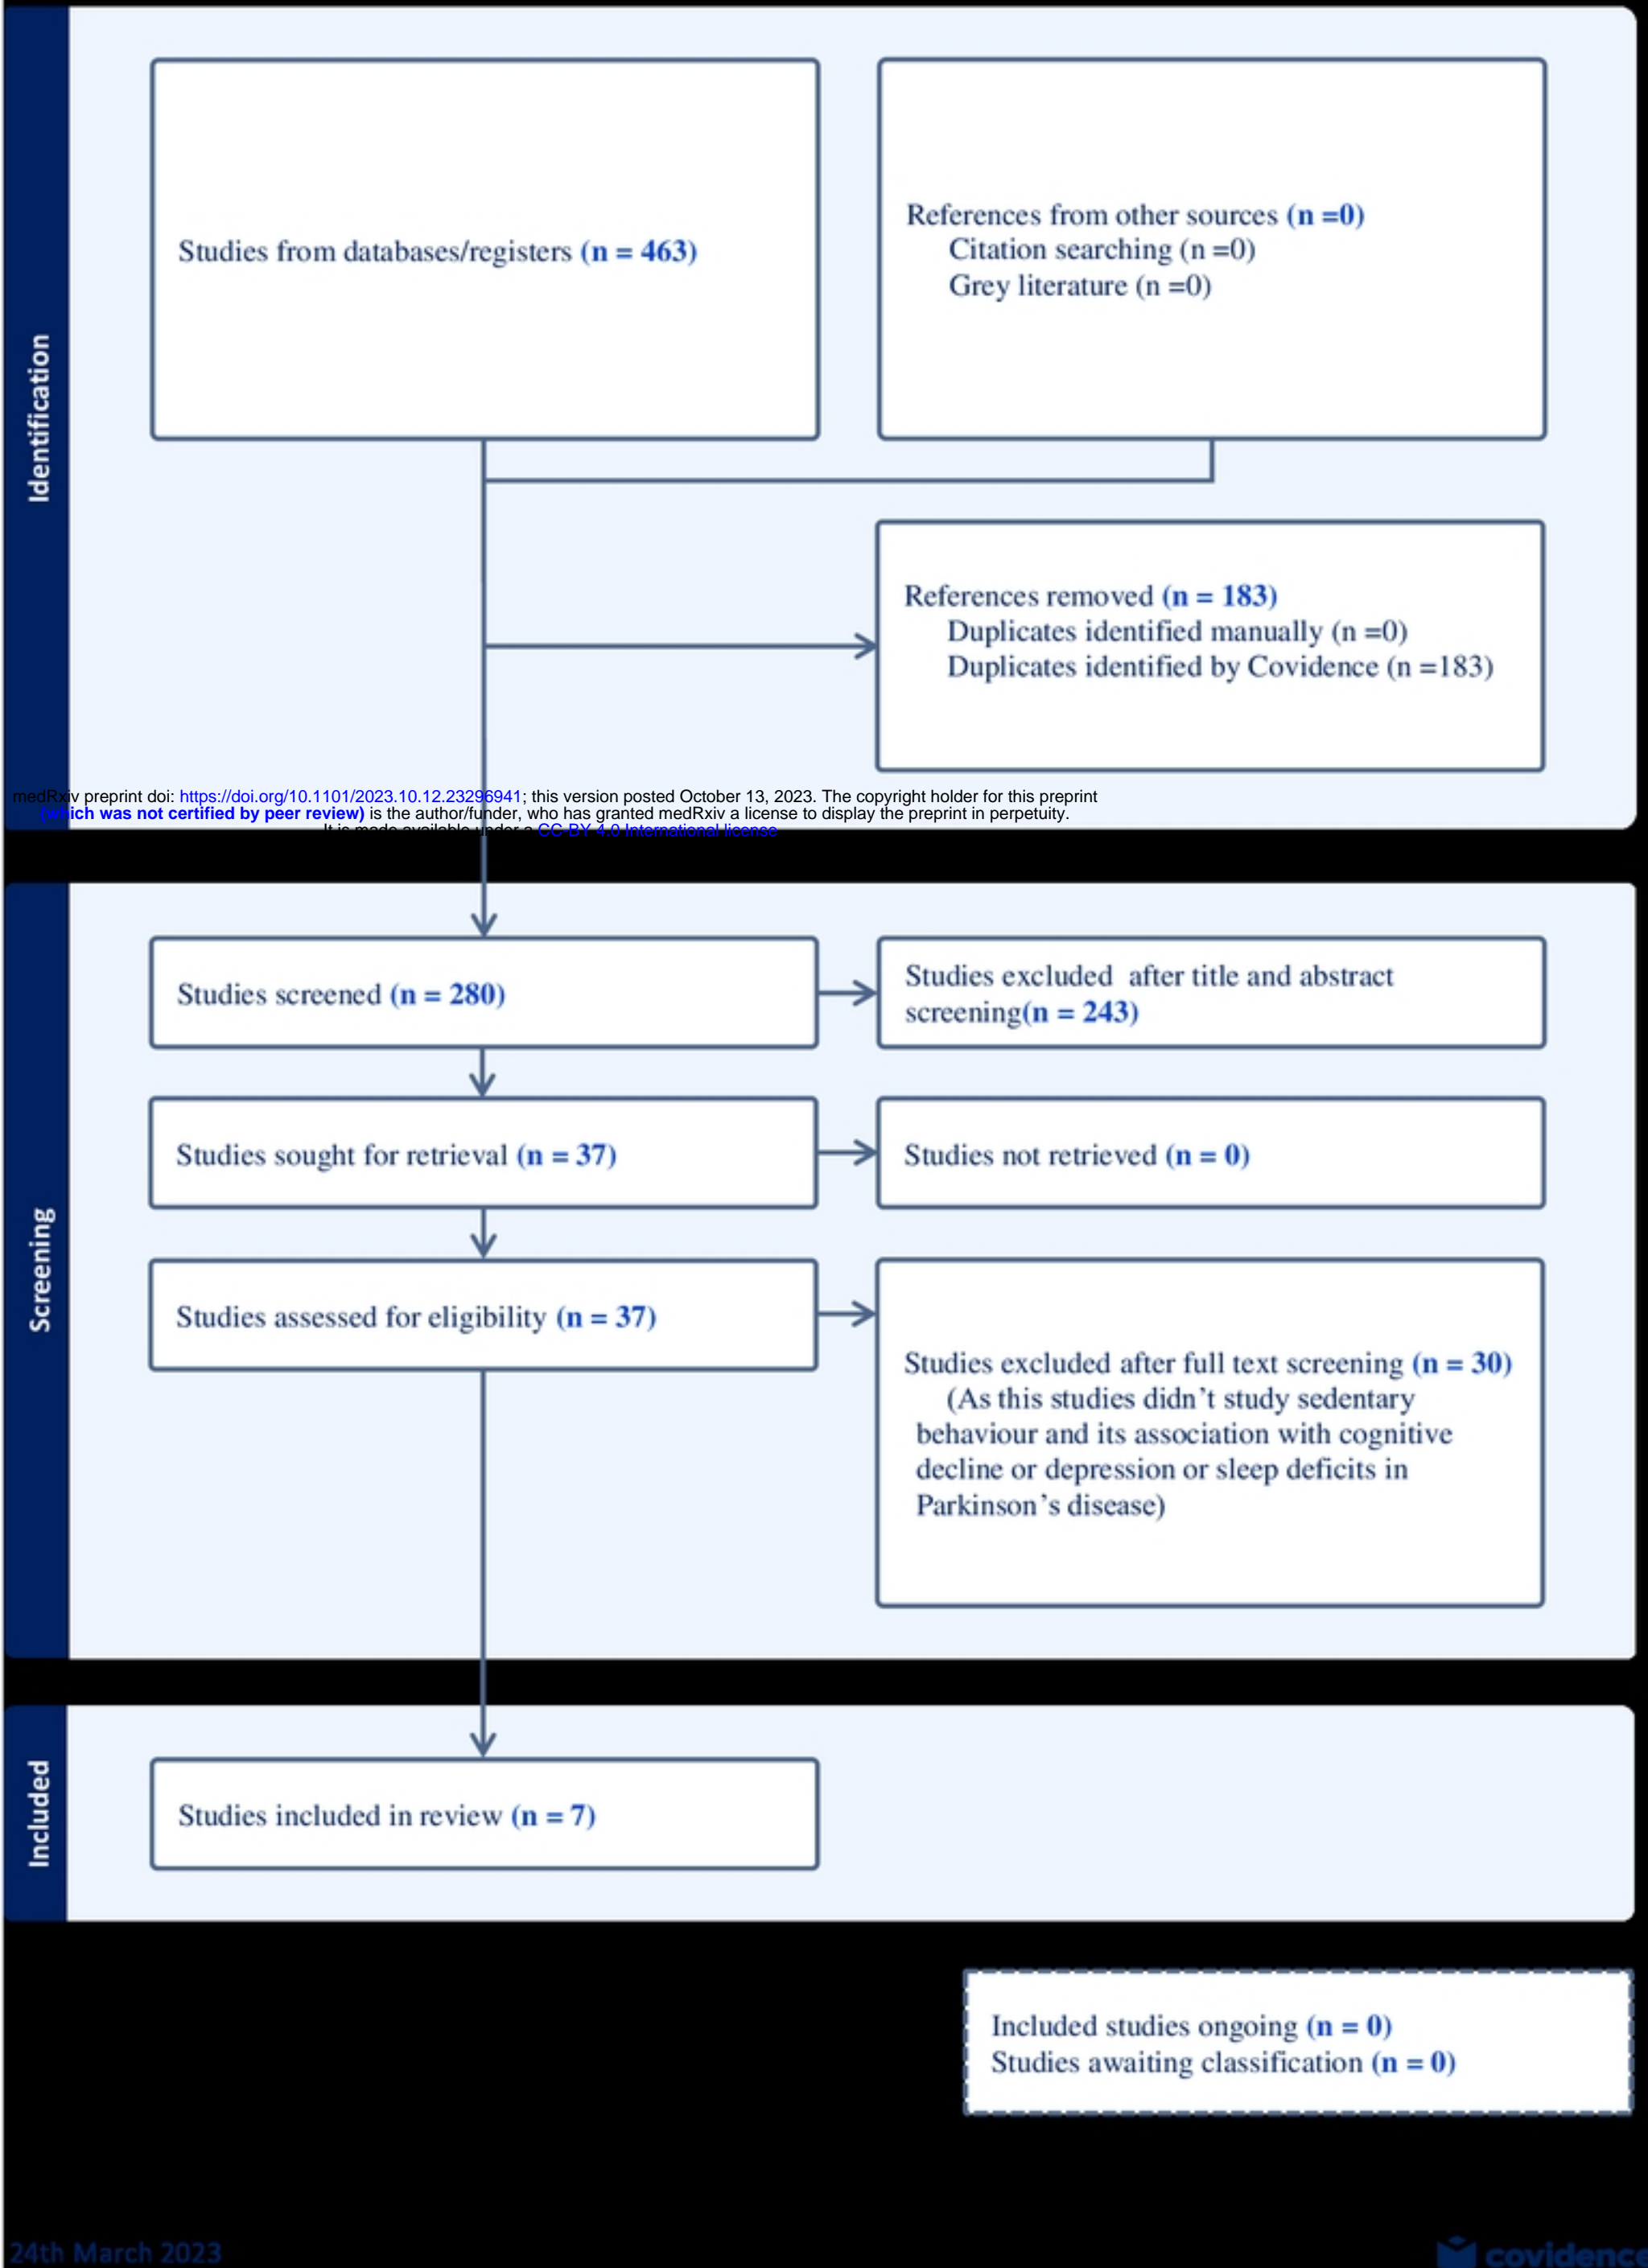

Figure 1

| Study ID(First author and year) | Selection                            |                                     |                            |                                                                          | Comparability | Outcome                |                                                 |                                  | Total      |
|---------------------------------|--------------------------------------|-------------------------------------|----------------------------|--------------------------------------------------------------------------|---------------|------------------------|-------------------------------------------------|----------------------------------|------------|
|                                 | Representativeness of exposed cohort | Selection of the non-exposed cohort | Ascertainment of exposure: | Demonstration that outcome of interest was not present at start of study |               | Assessment of outcome: | Was follow-up long enough for outcomes to occur | Adequacy of follow-up of cohorts |            |
| Patricia Sulzer, 2021           | *                                    | -                                   | *                          | *                                                                        | -             | *                      | *                                               | *                                | *****<br>* |
| Holly Timblin, 2022             | *                                    | -                                   | -                          | *                                                                        | -             | *                      | *                                               | *                                | *****      |
| Rachel A. Prusynski, 2022       | *                                    | -                                   | -                          | -                                                                        | -             | *                      | -                                               | *                                | ***        |
| Jacob D. Jones, 2021            | *                                    | -                                   | -                          | *                                                                        | -             | *                      | *                                               | *                                | *****      |

medRxiv preprint doi: <https://doi.org/10.1101/2023.10.12.23296941>; this version posted October 13, 2023. The copyright holder for this preprint (which was not certified by peer review) is the author/funder, who has granted medRxiv a license to display the preprint in perpetuity. It is made available under a [CC-BY 4.0 International license](https://creativecommons.org/licenses/by/4.0/).

Figure 2.a. Quality Appraisal for longitudinal studies using New Castle Ottawa Scale.

| Study ID (First author and year) | Selection                            |             |                   |                                                  | Comparability | Outcome                    |                   | Total          |
|----------------------------------|--------------------------------------|-------------|-------------------|--------------------------------------------------|---------------|----------------------------|-------------------|----------------|
|                                  | Representativeness of exposed cohort | Sample size | Non-Response rate | Ascertainment of the screening/surveillance tool |               | Assessment of the outcome: | Statistical test: |                |
| Sara B. W. Troutman, 2020        | *                                    | -           | -                 | **                                               | -             | **                         | *                 | **<br>**<br>** |
| Laura D. Ellingson, 2019         | -                                    | -           | -                 | **                                               | -             | **                         | *                 | **<br>**<br>*  |
| Janet M.T. van Uem, 2019         | *                                    |             | -                 | *                                                | -             | **                         | *                 | **<br>**<br>*  |

Figure 2.b. Quality Appraisal for case-control studies Newcastle-Ottawa Scale adapted for cross-sectional studies.

medRxiv preprint doi: <https://doi.org/10.1101/2023.10.12.23296941>; this version posted October 13, 2023. The copyright holder for this preprint (which was not certified by peer review) is the author/funder, who has granted medRxiv a license to display the preprint in perpetuity. It is made available under a [CC-BY 4.0 International license](https://creativecommons.org/licenses/by/4.0/).
